# Supplementary material for: Removing Pb2+ with a pectin-rich fiber from sisal waste
Source: Royal Society of Chemistry journal article supplement (doi:10.1039/d0fo02829k), 2021-01-01
Supplement: d0fo02829k1.pdf [file d0fo02829k1.pdf]

Table S1. Effects of DF supplemented feeds on body weight and organ coefficients.

| Group                 | IBW (g)    | FBW (g)    | Weight gain (g) | Feed intake (g) | LC (%)     | KC (%)    | BC (%)    |
|-----------------------|------------|------------|-----------------|-----------------|------------|-----------|-----------|
| Normal                | 22.3±1.43  | 22.48±1.55 | 0.31±1.54       | 308.02±8.11     | 4.42±0.45* | 0.65±0.11 | 2.26±0.19 |
| Blank                 | 21.92±1.21 | 22.29±1.11 | 0.36±1.44       | 306.01±8.18     | 5.04±0.39  | 0.68±0.09 | 2.36±0.17 |
| Positive control      | 22.19±0.70 | 22.41±0.89 | 0.29±1.31       | 301.19±4.40     | 4.97±0.34  | 0.60±0.05 | 2.03±0.12 |
| Soybean DF            | 23.16±1.38 | 24.92±1.16 | 1.68±0.80       | 320.86±4.70     | 4.66±0.58  | 0.63±0.83 | 1.89±0.09 |
| P-SF                  | 21.37±1.57 | 21.56±1.60 | 0.19±1.80       | 326.63±4.30     | 4.89±0.31* | 0.65±0.06 | 2.06±0.13 |
| Untreated sisal waste | 21.81±0.86 | 22.70±1.48 | 0.89±1.48       | 330.44±8.55     | 4.73±0.38  | 0.67±0.10 | 2.17±0.15 |

Data were presented as the means ± SD. IBW, initial body weight; FBW, final body weight; LC, liver coefficient; KC, kidney coefficient; BC, brain coefficient; #Differs from Normal,  $p < 0.05$ ; \* Differs from Blank,  $p < 0.05$ .
